# Virus and tumor microenvironment induced ER stress and unfolded protein response: from complexity to therapeutics

Kumari Asha<sup>1</sup> and Neelam Sharma-Walia<sup>1</sup>

<sup>1</sup>Department of Microbiology and Immunology, Chicago Medical School, Rosalind Franklin University of Medicine and Science, North Chicago, Illinois, U.S.A

**Correspondence to:** Neelam Sharma-Walia, **email:** neelam.sharma-walia@rosalindfranklin.edu

**Keywords:** endoplasmic reticulum stress; UPR; PERK; IRE1 $\alpha$ ; ATF6

**Received:** May 31, 2018

**Accepted:** July 21, 2018

**Published:** August 07, 2018

**Copyright:** Asha et al. This is an open-access article distributed under the terms of the Creative Commons Attribution License 3.0 (CC BY 3.0), which permits unrestricted use, distribution, and reproduction in any medium, provided the original author and source are credited.

## ABSTRACT

**Endoplasmic reticulum (ER) stress can be activated by various pathological and physiological conditions including the unfolded protein response (UPR) to restore homeostasis. The UPR signaling pathways initiated by double-stranded RNA-activated protein kinase (PKR) like ER kinase (PERK), inositol requiring enzyme 1  $\alpha$  (IRE1 $\alpha$ ), and activating transcription factor 6 (ATF6) are vital for tumor growth, aggressiveness, microenvironment remodeling, and resistance to cancer therapeutics. This review focuses on the role of ER stress and activity of UPR signaling pathways involved in tumor formation and uncontrolled cell proliferation during various cancers and viral malignancies.**

## INTRODUCTION

Endoplasmic reticulum (ER) is the cell organelle that maintains cellular homeostasis and participates in lipid synthesis, protein folding, translocation, and post-translational modifications [1, 2]. Various stress factors like hypoxia, starvation, and change in pH, calcium depletion, and viral infection can disturb the ER environment (Figure 1). This disrupts the process of proper protein folding within the ER, finally leading to the accumulation of misfolded or unfolded proteins causing ER stress. It further activates “the unfolded protein response” (UPR), a cellular homeostasis response connecting the ER to the nucleus to restore cellular equilibrium [3, 4]. In order to repair ER-associated degradation (ERAD), UPR can activate apoptosis or degradation of unfolded or misfolded proteins, which cannot enter into the secretory pathway (Figure 1). Cancer cells and viruses have their own adaptive mechanisms to control ER stress-induced apoptosis, which allows them to grow aggressively. Here, we discuss various factors present in the tumor microenvironment of cancer cells, virus infected host cell responses such as UPR and ER stress, and their therapeutic repercussions.

## UPR signal pathways

In response to cellular stress, a programmed signaling cascade gets activated which is known as the unfolded protein response or UPR. It is mediated by three highly specific signaling protein molecules named activating transcription factor 6 (ATF6), double-stranded RNA-activated protein kinase (PKR)-like ER kinase (PERK), and inositol requiring enzyme 1 (IRE1) [5]. UPR is regulated by master regulator protein, Glucose-regulated protein GRP78 or Binding immunoglobulin Protein (BiP/GRP78) and GRP94 [5]. Under normal conditions, the ER luminal domain of these transmembrane molecules including ATF6, PERK, and IRE1 is bound to the chaperone protein BiP/GRP78, which maintains them in an inactive state [5]. Under stressful conditions (Figure 2), when misfolded or unfolded proteins accumulate in the ER lumen, BiP/GRP78 dissociates from these transmembrane sensors and activates UPR signal pathways and downstream target genes including ATF4, CHOP, ER degradation-enhancing alpha-mannosidase-like protein 1 (EDEMI), growth arrest- and DNA damage-inducible gene (GADD) 34, BiP/GRP78, GRP94, protein kinase inhibitor of 58 kDa (p58IPK), and PDI. Each of these pathways uses a different mechanism such as PERK

inhibits translation, ATF6 regulates proteolysis, and IRE1 acts by degrading ER bound mRNAs [6].

Upon activation by ER stress, PKR-like ER Kinase PERK, oligomerizes and autophosphorylates its free luminal domain. The cytosolic domain phosphorylates the  $\alpha$  subunit of translational initiation factor eIF2, and subsequently inhibits the process of translation. Thus PERK helps reduce the burden of unfolded protein. However, under limiting eIF2, translation of transcription factor ATF4 is induced. ATF4 is associated with two target genes: 1) C/EBP homologous protein (CHOP) and 2) growth arrest and DNA damage-inducible protein (GADD34). CHOP is a transcription factor that controls genes associated with apoptotic pathways. Thus the phosphorylation of eIF2 $\alpha$  selects either a protective or an apoptotic role for PERK and is epitomized by the effects of alteration of its related phosphatases. GADD34; (a PERK inducible regulatory subunit of the protein phosphatase PP1c) dephosphorylates eIF2 $\alpha$  and thus reverses the effect of PERK [7]. Deletion of GADD34 or inhibition of the GADD34-PP1c complex formation may be protective for cells (Figure 2).

IRE1 plays the dual role of a transmembrane kinase and endoribonuclease that participates in mRNA splicing to transmit the UPR signal. IRE1 undergoes conformational changes and oligomerizes in the ER membrane. Upon activation, IRE1 cleaves the uXBP1 mRNA encoding XBP1 (X-box binding protein 1), at two specific positions, excising an intron and finally giving rise to a spliced mRNA that is translated to the active form of XBP1 (Figure 2). XBP1 is a transcription factor that targets genes encoding ER chaperones, oxidoreductases, and ERAD pathway components. XBP1s plays a special role in regulating lipid biosynthetic enzymes, ERAD components as well as elements involved in active secretory pathways (Figure 2) [8]. Mammals have two IRE1 paralogues as IRE1 $\alpha$  and IRE1 $\beta$  [9]. IRE1 $\alpha$  is ubiquitously expressed and is required for XBP1 mRNA splicing [10]. IRE1 $\beta$  expression is restricted to the intestinal epithelium, and elimination of IRE1 $\beta$  in mice leads to increased signs of ER stress, increased JNK (c-Jun N-terminal kinase) signaling, and the mice are highly susceptible to experimental colitis induced by dextran sodium sulfate [11].

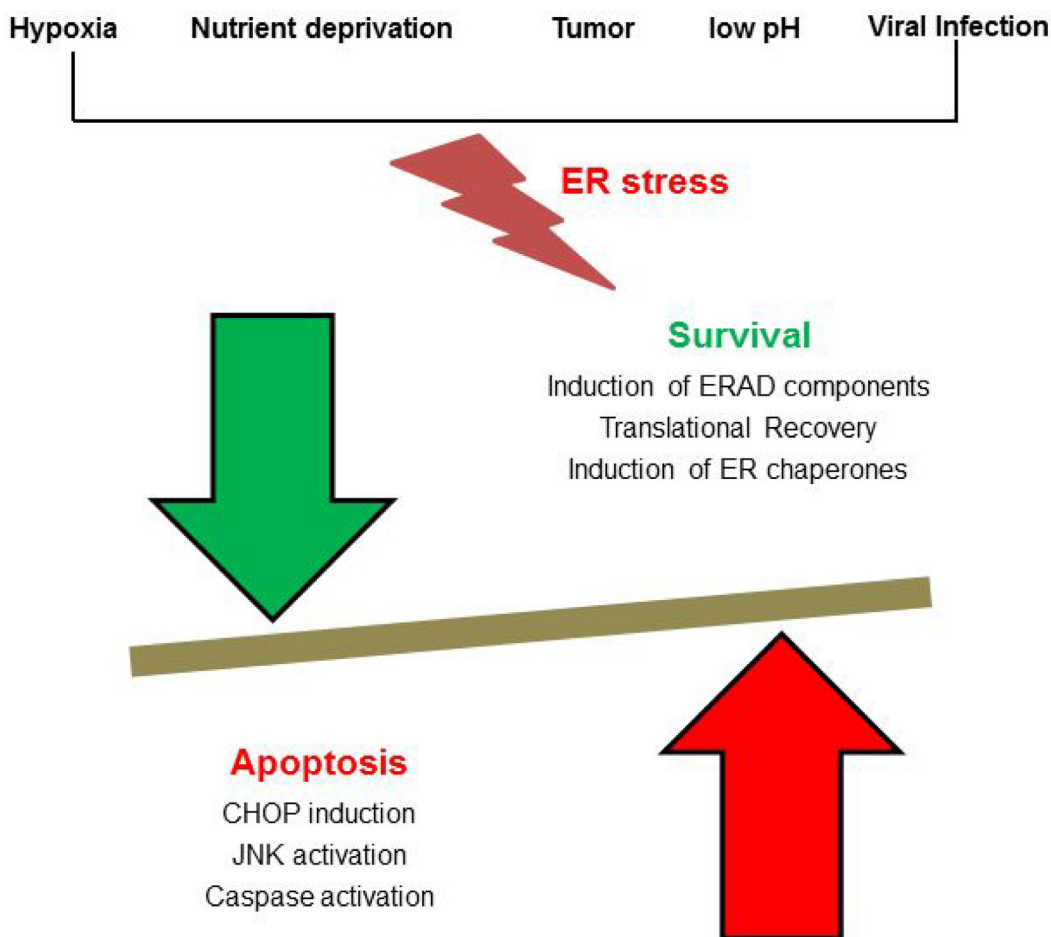

**Figure 1: Players of ER stress: Cellular stress such as metabolite deprivation, hypoxia, cancer or viral infection causes an increased load of misfolded protein in the ER thereby triggering a stress response.** Either genes coupled with ER associated protein degradation get activated or translation of protein gets inhibited, and the cell dies.

ATF6 is a membrane-bound transcription factor localized to the ER. ATF6 serves as both a sensor of ER stress and a transcriptional activator of UPR target genes [12]. Upon being activated by unfolded or misfolded proteins, ATF6 gets pinched off the ER and delivers the misfolded protein to the Golgi apparatus [13] where two proteases, Site-1 protease (S1P) and Site-2 protease (S2P)

cleave [14, 15] and release N-terminal, ATF6 (N), that travels to the nucleus to activate UPR target genes. Among these targets are major ER-resident proteins involved in protein folding such as BiP/GRP78 and disulfide isomerase. These chaperones participate in refolding and relieving ER stress. The GRP78 promoter contains three ER stress response elements (ERSE) located upstream of the TATA

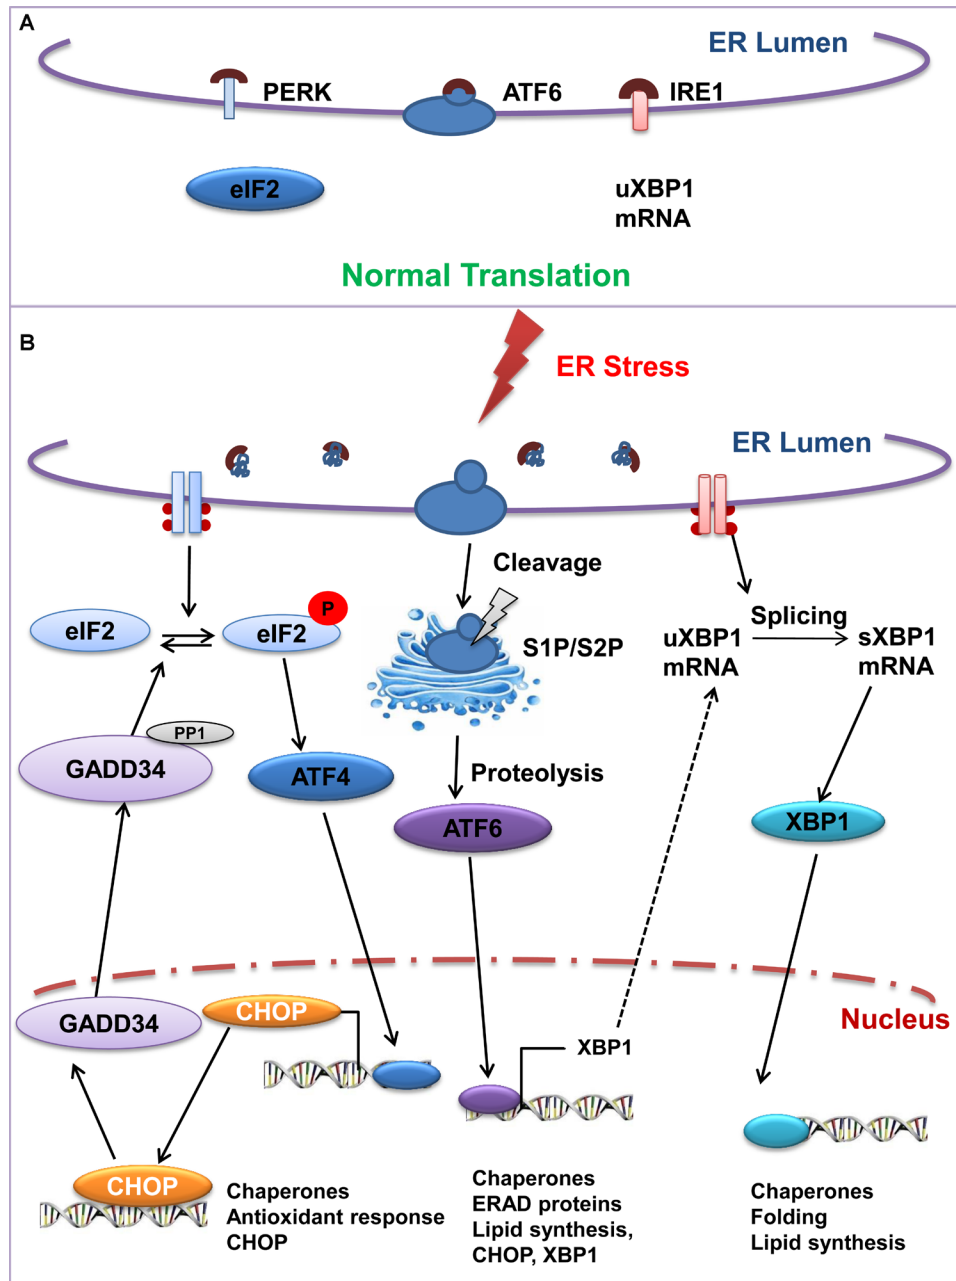

**Figure 2: The unfolded protein response signaling cascade: IRE1, ATF6, and PERK serve as a UPR sensor under ER stress.** (A) In normal condition, BiP/GRP78 remains bound to these UPR sensors. But under (B) stress condition BiP/GRP78 dissociates from the UPR sensors thereby activating these signal transducers. Activated IRE1 facilitates splicing of XBP1 mRNA and spliced protein translocates to the nucleus to regulate ERAD. Likewise, cleaved transcription factor 6 (ATF6) induces the expression of ER chaperones and ERAD associated molecules. The activated PERK attenuates protein synthesis by phosphorylation of eIF2 $\alpha$ , thereby enabling the translation of eIF2 $\alpha$ -activating transcription factor-4 (ATF4), which translocates to the nucleus and induces the transcription of numerous genes.

element [16]. ATF6 is a member of the leucine zipper protein family that can constitutively induce the promoter of glucoseregulated protein genes through activation of ERSE [17]. ATF6 is also known to induce XBP1 expression and increase the sum of XBP1u and XBP1s [18]. All these three branches of UPR have opposing signals and their relative induction may shift the balance between cytoprotection and apoptosis. The complexity of regulation is further increased because the very components of UPR, including IRE1, XBP1, PERK, and ATF6, are themselves transcriptionally controlled by UPR [19].

## Tumor microenvironment

The tumor microenvironment is the cellular surroundings of the tumor, which includes both stromal and non-stromal components. Stromal cells secrete cytokines and growth factors and interact with tumor cells in reciprocal manner. Tumor cells affect stromal cell phenotype by modifying microenvironment. Stromal cells support tumor cell growth by promoting invasion and metastasis. The stromal components in tumor microenvironment include endothelial cells, immune cells, inflammatory cells, lymphocytes, and cancer associated fibroblasts (CAFs), the extracellular matrix (ECM) and signaling molecules (Table 1). Activated CAFs in the tumor microenvironment not only helps tumor cells proliferate by supplying nutrition but also secretes various growth factors (hepatocyte growth factor- HGF, fibroblast growth factor- FGF) and cytokines. CAF releases a large number of mesenchymal transducing soluble factors to remodel the ECM [20]. Endothelial cells lining tumor blood vessels produce pro-angiogenic factors and also promote migration, metastasis, and evade anoikis [21, 22]. Immune cells in the tumor environment may either activate CD4 helper and CD8 cytotoxic T lymphocytes in an MHC I and MHC II dependent manner or promote tumor growth in the presence of infiltrating leukocytes. As stated previously in this section, the UPR not only affects the processes of angiogenesis, inflammation and host immune response but also mediates the signaling between tumor and non-tumor cells [22]. Cancer cells communicate their message into the tumor vicinity through a paracrine effect on myeloid cells using small molecules, ions, proteins, and nucleic acids. These myeloid infiltrating cells become immunologically tolerant and start secreting many signaling molecules such as growth factors, cytokines, and exosomes. UPR enriches tumor fitness by being transmitted from cancer cells to the cells of the tumor microenvironment. This transmissible ER stress (TERS) has multiple effects on the recipient cells *in vitro* and *in vivo* [23]. TERS upregulates tumorigenic inflammatory cytokines (IL-6, IL-8, IL-23), inflammatory metabolite PGE2 and decrease T cell response [24]. TERS control immune cell development, function, and survival in both the pathological and physiological conditions.

The tumor microenvironment is comprised of hyperactive pro-oncogenic genes and mutant tumor suppressor genes that are responsible for the highly proliferative and metabolically demanding cellular environment [25]. Due to the metabolically demanding stress environment, tumor cells thrive in conditions of hypoxia, glucose deprivation, lactic acidosis, oxidative stress, alteration in nitrogen species, lipid peroxidation, and decreased amino acid supplies [25, 26]. Premalignant cells have the added advantage of gene mutations, which curb UPR induced apoptosis or senescence promoting survival and growth [27]. All these changes due to intrinsic and extrinsic factors of the microenvironment contribute to the UPR activation induced by ER stressors. Unlike normal cells, cancer cells demonstrate constitutive activation of the UPR system (IRE1 $\alpha$ -XBP1) under stress conditions [28, 29]. IRE1 $\alpha$  mutants lose their regulated IRE1-dependent decay of mRNA (RIDD) function and show increased cell survival [30].

## Hypoxia

The tumor microenvironment has poor microcirculation, which causes hypoxia in the cell. Hypoxia leads to UPR activation, which eventually initiates another cycle of cell proliferation and subsequent hypoxia in tumor cells [31]. Although hypoxia is not ideal for general protein translation but in the case of malignancy, hypoxia induces the upregulation of hypoxia-inducible factor 1 alpha (HIF1- $\alpha$ ), which stimulates angiogenesis and activation of metastatic genes [32]. Hypoxia triggers PERK signaling in mammalian cell lines [33]. The UPR activation mediated by downstream effectors of eIF2 $\alpha$  phosphorylation and activated IRE1 develops hypoxia tolerance [34]. Activation of hypoxic-modulated molecular responses depends on cellular oxygen levels and the duration of hypoxia. UPR mediated induction of endoplasmic reticulum oxidoreductin 1 (ERO1) [35, 36] leads to generation of reactive oxygen species (ROS) in mitochondria [37] and ER during hypoxia.

## Reactive oxygen species (ROS) and inflammatory mediators

ROS in the tumor microenvironment promotes genetic and epigenetic alterations favorable for tumor growth and progression [38]. ROS can target ER resident proteins and ER based calcium (Ca<sup>2+</sup>) channels leading to ER stress signaling. Increased cytosolic calcium and calcium ingress in mitochondria from ER stimulates further ROS production [39]. This process activates PERK mediated Nrf2 induction which promotes cancer cell proliferation [40]. Proinflammatory cytokines like IL6 and tumor necrosis factor  $\alpha$  (TNF $\alpha$ ) present in the tumor microenvironment further add to the ER stress induced UPR activation. All three branches of the UPR pathway activate



**Table 1: Tumor microenvironment**

| Cellular components                                                                                                                                                                                                                                                             | Non-cellular components                                                                                                                                                                                                                                                                                                      |
|---------------------------------------------------------------------------------------------------------------------------------------------------------------------------------------------------------------------------------------------------------------------------------|------------------------------------------------------------------------------------------------------------------------------------------------------------------------------------------------------------------------------------------------------------------------------------------------------------------------------|
| Cells of hematopoietic origin: cells that arise in the bone marrow –<br>Lymphoid cells- T cells, B cells and NK cells<br>Myeloid cells- Macrophages, neutrophils and myeloid-derived suppressor cells (MDSCs).<br>Other cell types- Macrophages, platelets and dendritic cells. | Non-cellular components: Extracellular matrix (ECM) consisting of many distinct components — including proteins, glycoproteins and proteoglycans                                                                                                                                                                             |
| Cells of mesenchymal origin: Includes fibroblasts, myofibroblasts, mesenchymal stem cells (MSCs) and adipocytes.<br>Angiogenic cells- Endothelial cells and pericytes                                                                                                           | Growth factors:<br>Angiogenic growth factors: VEGF, FGF2<br>Epidermal growth factor (EGF) family- TGF $\alpha$ , EGF, AR<br>Platelet-derived growth factor (PDGF)<br>Cytokines and chemokines (CXCL12 and interleukin (IL-8)<br>Osteoclastogenic growth factors- M-CSF, RANKL<br>Cyclooxygenase-2 (COX-2) and prostaglandins |

Besides carcinoma cells, the tumor microenvironment also consists of cellular components of myeloid and mesenchymal origin along with non-cellular components. A major non-cellular component in the tumor microenvironment is the extracellular matrix (ECM) that facilitates the maintenance of tumor structure and functionality. Abnormal ECM has been reported to promote tumor progression and angiogenesis.

NF- $\kappa$ B through different mechanisms. PERK-eIF2 $\alpha$  signals translational arrest and increased NF- $\kappa$ B/I $\kappa$ B ratio, leading to NF- $\kappa$ B nuclear translocation [41, 42]. ATF6 $\alpha$  activates NF- $\kappa$ B through AKT phosphorylation [43, 44]. IRE1 $\alpha$ -TNF receptor-associated factor 2 (TRAF2) complexes can bind to NF- $\kappa$ B leading to I $\kappa$ B phosphorylation and degradation, and nuclear translocation of NF- $\kappa$ B [45]. The TRAF2-IRE1 complex initiates proapoptotic signaling by activating Apoptosis Signal Regulated Kinase (ASK1), which subsequently transmits the death signal to c-Jun N-terminal kinase (JNK). JNK phosphorylates Bcl2 and abrogates its anti-apoptotic activity [46].

Various inflammatory mediators, such as eicosanoids including prostaglandins and leukotrienes have also been associated with ER stress and UPR. An *in vivo* study carried out in a murine model showed that insulin-sensitizing effects of 5-LO siRNA or zileuton is due to LTB4 downregulation and AMPK activation [47]. LTB4 was identified as the critical player in the ER stress pathway, reactive oxygen species (ROS) generation and inflammation [47]. Glucose deprivation in colorectal cancer cells increased cyclooxygenase-2; COX-2 and reduced 15-hydroxyprostaglandin dehydrogenase; 15-PGDH expression and thus upregulated extracellular inflammatory prostaglandin PGE2, which promoted cancer cell survival. These studies emphasized the role of inflammatory mediator PGE2 as mediator of cell survival during adaptation to the tumor microenvironment, which can lead to novel therapeutic strategies [48]. Another eicosanoid, leukotriene C4 (LTC4), has also been reported as a major ER stress mediator that is also observed in chemotherapy triggered oxidative stress, DNA damage and dsDNA breaks [49].

### Nutrient deficiency and angiogenesis

Tumor cells grow in a glucose deficient environment, which causes accumulation of misfolded protein within the ER affecting calcium concentration that activates PERK [50]. Tumor cells switch to a high rate of aerobic glycolysis producing lactic acid [51] and activate XBP1 and PERK/ATF4-mediated UPR components. BiP/GRP78 is also upregulated in a glucose deficient tumor microenvironment [52]. Amino acid deprivation induces eIF2 $\alpha$  phosphorylation. Various growth factors like epidermal growth factor (EGF), transforming growth factor- $\alpha$  (TGF- $\alpha$ ) released within the tumor microenvironment activates UPR. Wang and colleagues demonstrated that nutrient deficiency activates UPR in an IRE1 $\alpha$ /XBP-1, PERK-ATF4, and ATF6 $\alpha$  dependent manner and stimulates inflammatory cytokine (IL 6), fibroblast growth factor-2 (FGF-2), and vascular endothelial growth factor (VEGF) signaling [30, 53].

All these studies suggest that UPR activation in tumor cells is marked by both intrinsic and extrinsic factors. The high metabolic demand of the tumor microenvironment activates UPR and subsequently augments oncogenes or mutations in tumor suppressor genes and increases protein synthesis, and translocation into the ER. Additionally, cancer cells being secretory in nature are prone to UPR activation.

### ER STRESS COMPONENTS IN DIFFERENT TYPE OF CANCERS

Cancer cells differ from normal cells in their ability to manipulate ER stress induced cell death and are thus

resistant to apoptosis. The three branches of UPR are associated with different phases of growing tumors. For example, IRE1 signaling plays a crucial role during hepatocellular carcinoma (HCC) initiation [54]. Likewise PERK signaling helps colorectal cancer cell and squamous cancerous cells to survive in a nutrient and oxygen deficient tumor microenvironment [55, 56]. All three UPR signaling transducers are involved in progression of prostate cancer [57]. The major UPR inducing pathway in tumor is mediated by hypoxia. Recent studies have shown that spliced XBP1, a major component of the IRE1 pathway, promotes cancer cell survival by forming a transcriptional complex around hypoxia-inducible factor-1 (HIF-1) [58]. In the case of breast cancer, HIF functions as a chief regulator by aiding in transcription of genes responsible for expressing proteins that are essential to metastasis. It also participates in the process of epithelial mesenchymal transition (EMT), invasion, injury, extravasation, and metastatic niche formation. ER stress drives EMT in *in vitro* and in animal models of fibrosis through src-mediated signaling and contributes to cancer cell invasion [59]. ER stress also plays an important role in ER-mitochondrial communication. Activation of the classical UPR of ER is necessary for mitochondrial proteotoxicity or mitochondrial UPR (UPR<sup>mt</sup>). Mitochondrial HSP90 chaperone and its related protein, TRAP-1, are abundant in the mitochondria of tumor cells but not in those of healthy tissues, and they appear to antagonize mitochondrial death pathways [60]. Impaired function of mitochondrial HSP90 leads to a mitochondrial UPR and the induction of autophagy [61]. HIF is also involved in the progression of triple negative breast cancer [58, 62]. XBP1 is also known to modulate endoplasmic reticulum lipid raft associated 2 (ERLIN2) protein expression, which possess the capacity to protect breast cancer cells from ERAD promoting their survival [63]. The estrogen-mediated increase in GRP78, in breast cancer cells expressing estrogen receptor  $\alpha$  [NR3A1] confers improved resistance to ER stress and cell proliferation both of which can be decreased through siRNA mediated knockdown of estrogen receptor  $\alpha$  [64]. Tamoxifen has been designed to block NR3A1, in estrogen receptor positive (ER+) breast cancer [65]. HER2-positive tumors have higher sensitivity to inhibition of HSP90 since HER2 is a client protein of Hsp90 [66]. Pancreatic ductal adenocarcinomas (PDACs), with an extremely poor prognosis of a one year survival, have been shown to become significantly hypoxic as they grow. Activation of both PERK and IRE1 arms of the UPR are delayed in the presence of ER stressors in pancreatic cancer cells as compared to normal pancreatic cells [67]. Furthermore, adapting to chronic ER stress has been related to the induction of anterior gradient 2 (AGR2) that contributes to the initiation and development of PDAC [68]. Along with chemotherapy, radiotherapy is another component of the mainstay treatment for cancers of lung, breast, and

prostate. Addition of radiotherapy to a patient treatment plan adds to the complexity as it activates multiple cell signaling cascades and induction of ER stress. A better understanding is required to study the influence of UPR function on radio- chemo- and sensitivity in extremely mucinous and secretory breast cancers as these forms of cancers are more dependent on UPR. Pharmacological manipulation of downstream UPR pathways may improve and increase tumor cell killing and reduction of toxicity to the neighboring healthy tissue.

## Viral pathogenesis

Viral infection of host cell depends on competition between virus infection and the host response. The host cell, if conquered, gets acute or chronic infection. Each step in the viral life cycle beginning from viral entry and replication into the host cells to release of mature virions can be deleterious to host. Expression of viral protein, imbalance of calcium concentration by viroporins and consequent depletion of ER membrane due to the release of virions [69] cause ER stress in the host cell by generating loads of unfolded or misfolded proteins [1]. The host cell generates UPR to promote the ERAD pathway against viral infection. Viruses (RNA/DNA virus) may manipulate the host UPR in a way to maintain an environment favorable for its infectivity and persistence in the diseased cell (Table 2) [70, 71].

Among such chronic viruses is a family of herpesviruses, which utilize host UPR to maintain latency in the host. Herpesvirus mimics many host molecules and utilizes UPR to set up active lytic infection and to break dormancy of latent phase, thereby proving long time interaction of virus with host UPR. In the case of gammaherpesviruses, human herpesvirus 8 (HHV8) or Kaposi's sarcoma associated herpesvirus (KSHV) studies have shown that primary effusion lymphoma (PEL) cells are immunophenotypically similar to pre-plasma cells and have unspliced XBP-1 mRNA [72, 73]. Under ER stress XBP-1 mRNA is processed to XBP-1s, which binds to the KSHV ORF50 promoter and upregulates KSHV ORF50 gene expression inducing KSHV lytic replication. In an elegant study, Paul M. Lieberman's group reported that the ER stress due to different stimuli triggers RAD21 cleavage and lytic switch in PEL cells [74]. They also found that few ER stress inducers such as DTT and protein synthesis inhibitors, were more effective in inducing RAD21 cleavage and lytic reactivation than others. For example, SubAB cytotoxin and tunicamycin, induced only partial cleavage of RAD21 with slower kinetics and lower amplitude of KSHV lytic reactivation. The slower kinetics of these compounds may be associated with a distinct ER stress induced by them when compared to broadly acting chemical inhibitors [75] which may be modulating additional pathways to activate a broader range of caspases resulting in complete cleavage of RAD21. PEL

**Table 2: Different RNA and DNA viral diseases and associated ER stress pathways**

|             | ER stress signaling pathway | Virus - viral protein                                                                                                                                                                                                                                                                              |
|-------------|-----------------------------|----------------------------------------------------------------------------------------------------------------------------------------------------------------------------------------------------------------------------------------------------------------------------------------------------|
| RNA Viruses | PERK- eIF2 $\alpha$ pathway | <ul style="list-style-type: none"> <li>• Hepatitis C Virus- E2 and NS5A</li> <li>• Vesicular stomatitis virus -M protein</li> <li>• Japanese encephalitis virus -NS2A</li> <li>• Influenza A virus -NS1</li> </ul>                                                                                 |
|             | IRE1–XBP1–ERAD pathway      | <ul style="list-style-type: none"> <li>• Hepatitis C Virus - E1 and/or E2</li> <li>• Hepatitis E Virus -ORF2</li> <li>• Dengue Virus -DENV2</li> </ul>                                                                                                                                             |
|             | ATF6 pathway                | <ul style="list-style-type: none"> <li>• Dengue Virus-DENV2</li> <li>• Epstein-Barr virus -EV71</li> <li>• Influenza A virus -HA</li> </ul>                                                                                                                                                        |
| DNA Viruses | PERK- eIF2 $\alpha$ pathway | <ul style="list-style-type: none"> <li>• Hepatitis Simplex Virus 1- <math>\gamma</math>134.5 Protein</li> <li>• African swine fever virus- DP71L</li> <li>• Hepatitis B Virus - S protein</li> <li>• Papillomavirus- E6</li> <li>• Vaccinia virus-E3L</li> <li>• Cytomegalovirus- pUL38</li> </ul> |
|             | IRE1–XBP1–ERAD pathway      | <ul style="list-style-type: none"> <li>• Hepatitis B Virus- HBx and S proteins</li> <li>• Cytomegalovirus-US11, pUL38</li> </ul>                                                                                                                                                                   |
|             |                             |                                                                                                                                                                                                                                                                                                    |

cells are sensitive to ER stress-inducing agents, like chloroquine and it can be linked to a defect in the PERK and IRE1 $\alpha$  [76, 77]. This particular sensitivity of PEL cells may control KSHV latency epigenetically. Similar *in vitro* and clinical studies have shown that induction of ER stress by 2-Deoxy-D-glucose (2-DG) shuts down viral replication and lytic gene expression. Thus the study not only supports the therapeutic potential of glucose/mannose analogs against gammaherpesvirus but also suggests the possible usage of this approach against other virus-driven cancers. 2-DG downregulates mRNA levels of numerous viral genes required for replication, including regulator of transcription activator (RTA), thereby impairing RTA transactivation loop subsequently leading to the inhibition of KSHV lytic gene transcription cascade [78]. Our studies demonstrated that HHV-8 utilizes arachidonic acid (AA) pathway enzymes (cyclooxygenase-2; COX-2, 5-lipoxygenase; 5-LO, leukotriene A4 hydrolase; LTA4H) and its metabolites (prostaglandin E2, PGE2, leukotriene B4; LTB4) in their life cycle, especially in the maintenance of its latency, and effective inhibition of these pathways could potentially be used in treatment to control KS/PEL [79–82]. Unpublished results from our lab demonstrate that KSHV infection induced LTA4H serves as a link between KSHV life cycle and its adaptation to the host cell ER stress. Use of Bestatin, a well-known LTA4H inhibitor or LTA4H silencing induced proliferation arrest in KSHV+ PEL cells when compared to non-infected (KSHV–; BJAB) Burkitt’s lymphoma cells. LTA4H inhibition induced ER stress proteins (calnexin, BiP, IRE1- $\alpha$ , and CHOP) and stimulated phosphorylation of PERK and eIF2 $\alpha$ , which might be causing translation

arrest and apoptosis in PEL. We also demonstrated that KSHV infection downregulates anti-inflammatory and pro-resolving metabolites such as lipoxins for successful viral life cycle and pathogenesis [83, 84]. It has been proven that Varicella-zoster virus (VZV), which possesses smallest genome of human herpesviruses, lacks a few genes used by other herpesviruses to manipulate the UPR [85]. Later, John Carpenter and Charles Grose established that VZV differentially induced the upregulation of UPR to deal with viral glycoprotein synthesis [86]. VZV upregulated cAMP responsive element binding protein H, an atypical UPR molecule [86]. Clearly, this will pave the way for future studies to disclose the relationship between VZV and UPR. Many viruses have evolved mechanisms to antagonize UPR induced eIF2 $\alpha$  phosphorylation and translation control. Among these viruses is Herpes simplex virus I (HSV-I), which encodes ICP34.5, a protein homologous to cellular protein GADD34, that dephosphorylates eIF2 $\alpha$  so that protein translation can proceed [87]. Likewise the African swine fever virus, encodes DP71L, which shows homology to HSV ICP34.5 protein and can also associate with the enzyme that dephosphorylates eIF2 $\alpha$  [88].

Paradoxically, proteins that are expected to induce ER stress at low levels act as inhibitors of ER stress instead. For example, HCV and HSV-1 viral envelope glycoproteins E2 and gB work as specific inhibitors of PERK [89, 90]. ER stress and the UPR have been aiding in viral replication. Human cytomegalovirus US11 protein and herpesvirus US2 activate UPR to increase degradation of the class I major histocompatibility complex proteins [91] resulting in an escape from the host immune response.



For many reoviruses competing with host mRNA molecules, increased ATF-4 expression induced by eIF2 $\alpha$  phosphorylation is beneficial for viral replication [92]. The promoter of hepatitis B virus (HBV) is upregulated by ER stress [93]. Thus, it can be concluded that some viruses have evolved mechanisms to flee the negative effect of ER stress and concurrently exploit preferred UPR induced factors to their own advantage. In case of severe acute respiratory syndrome coronavirus (SARS-CoV) accessory viral protein binds to ATF6 domain thus inducing proteolysis of ATF6 [94]. The cleaved DNA binding and transcription activation domains of ATF6 then move from ER to the nucleus [94]. These findings suggest that viruses may exploit their own protein(s) to directly modulate UPR responses. Viruses can also exploit the ERAD pathway [95] to degrade immune molecules or viral envelope glycoproteins to escape immune responses of the host. Polyomaviruses use ERAD during their life cycles to uncoat the capsid and present the nuclear localization signals on capsid proteins for initiation of viral DNA replication and virion maturation. Viruses can hinder ERAD tuning and can use ERAD-associated machinery to form isolated lipid vesicles for replication and as an escape from immune detection.

UPR in the host is much more than a homeostatic cellular response to virus infections. UPR is closely associated with inflammatory pathways and innate immunity induced by host pattern recognition receptors (PRRs). As a response to this the professional virus killer gets activated and releases interferons. One of the proximal UPR sensors, inositol-requiring enzyme 1 (IRE1) which activates IRE1-dependent decay (RIDD), is evolutionarily related to virus killer RNase L [96]. Since viruses naturally infect and transfer DNA into the host cells, viral vectors are now being increasingly used as gene delivery vehicles in gene therapy. Vectors based on retroviruses integrate their viral genome into the chromosomal DNA of the host cell. Episomal vectors like adenovirus and HSV-1 deliver their genomes into the nucleus of the target cell, where they continue as separate extrachromosomal element. Vaccinia viral vectors have also been used for cancer gene therapy [97, 98] because of proficient infectivity and gene expression in complex tumors [99]. Also, the safety profile of Vaccinia virus has already been determined due to its use as a vaccine for small pox in humans [99]. Viruses from the *Herpesviridae* family (VZV, EBV) are also being used for cancer gene therapy [100]. EBV, owing to its specificity for B cells, has been utilized to deliver (granulocyte-macrophage colony-stimulating factor) GM-CSF therapy to patients of B-cell chronic lymphocytic leukemia (B-CLL) [101]. Since EBV and other viruses are infective to cells, their modification and validation is essential to make them safe enough to be used for gene therapy. It is becoming significantly important to study and understand virus host interactions so that viral vectors can be used in gene therapy [102].

## THERAPEUTIC STRATEGIES TO CONTROL ER STRESS RESPONSES IN CANCER

As discussed, stress stimuli in the tumor microenvironment activate UPR, which further influences cellular processes such as metastatic growth, apoptosis, inflammation, and host immune responses. There can be two strategic plans to target UPR signaling- one by effectively killing cancer cells or by hindering UPR-mediated adaptive responses which may help tumor cells proliferate in harsh tumor microenvironment conditions and resist the treatment.

UPR effectors upregulate VEGF-A and other pro-angiogenic factors in cancer cells [63, 103] including breast cancer [104, 105]. BiP/GRP78, a master regulator for ER stress response helps premalignant cells adapt to UPR induced apoptosis. So therapeutic strategies aimed at reducing BiP/GRP78 or targeting UPR sensors can be effective against cancer. BiP/GRP78 is increased in a variety of cancer types including breast, lung, colon, prostate, skin, melanoma and many other malignancies [64, 106, 107]. Our study and similar studies from the past reported high levels of GRP78 are associated with rapid proliferation and malignancy of tumors [64, 108]. In breast cancer cells associated with estrogen receptor  $\alpha$  [NR3A1], increase in GRP78 abundance signifies cell proliferation and improved resistance to ER stress. The siRNA-mediated knockdown of estrogen receptor  $\alpha$  can be strategically used to prevent tumor progression in these cases [64]. Similarly, chemotherapeutic agents can be used to reduce GRP78 in glioblastoma cell lines and solid tumors. The therapy increases expression of CHOP and caspase 7, leading to inhibition of tumor formation and finally inducing cellular apoptosis [108, 109]. BiP/GRP78 is positively regulated by the mitogen activated protein kinase MAPK pathway. Thus inhibition of the MAPK pathway boosts caspase-4 mediated ER stress induced apoptosis in melanoma cells. Moreover, there are antitumor agents that decrease GRP78 at the protein level by directly binding GRP78 to facilitate its degradation [108]. Based on these characteristics, GRP78 is considered as a biomarker of cancer progression [110]. Since inhibition of BiP/GRP78 can play a cytoprotective role, therefore it is being utilized in developing treatment strategies against multidrug resistant cancer. Likewise UPR signal transducers and proteasome inhibitors such as Bortezomib [111] involved in activating UPR can also be used to check cancer progression.

XBP1 represents a regulator of plasma cell differentiation and overexpression of XBP1 is critical for multiple myeloma induction. Inhibition of XBP1 splicing has been shown to reduce multiple myeloma cell growth. XBP1 splicing induced by IRE1 $\alpha$ , prompt cellular proliferation through increased expression of cyclin A1 thus IRE1 $\alpha$  inhibition may expose multiple myeloma cells to ER



stress and reduce their survival [112]. Chevet *et al*, 2015 and other groups of scientists have shown that directed therapeutics targeting the RNase activity of IRE1 reduces the progression of various forms of cancer [113, 114]. Similar approaches have been pursued in various models of experimental glioblastoma [115–117]. Studies on human cancer tissue samples (Cancer Genome Atlas Research Network, 2008; Parsons *et al*, 2008) revealed the presence of three somatic mutations (S769F, Q780 and P336L) on the IRE1 gene in GBM [118, 119]. Chevet *et al*, 2018 also showed the antagonist role of XBP1s and RIDD on tumor growth, where RIDD of mRNA and miR17 depict anti-tumoral features by remodeling of tumoral stroma [120]. Recent studies have shown that STF-083010, an inhibitor for XBP1, can restore sensitivity to tamoxifen in tamoxifen resistant MCF-7 cell lines and a synergistic effect of both drugs significantly delay breast cancer progression. Clinical trials have further demonstrated that XBP1 expression levels are highly correlated to cell survival in ER+ breast cancer patients. Loss of XBP1 has been linked to spontaneous intestinal inflammation and inflammatory bowel disease in humans [121]. Modulators of IRE1 signaling like MKC-3946 [103], 3-methoxy-6-bromosalicylaldehyde [122], 4 $\mu$ 8C [123], STF-083010 [124], KIRA-6 and toyocamycin [125] are being therapeutically used in the case of multiple myeloma. These inhibitors are shown to kill cancer cells or sensitize them to common chemo- or radiotherapies. The inhibitors of XBP1 mRNA splicing work efficiently and do not affect the phosphorylation and the oligomerization of IRE1. ATF6 negatively regulates genes involved in cellular senescence and mediates cell survival through upregulation of LC3B, a component of the autophagosomal membrane. ATF6 is also responsible for upregulation of XBP1 and thus BiP/GRP78 expression in liver cancer [126].

Under hypoxic conditions the PERK/eIF2 $\alpha$  pathway increases cell growth and survival of cancerous cells. Since PERK activates many angiogenic genes, its inhibition was found successful in reducing tumor growth both *in vitro* and *in vivo*. Recently our lab and other ongoing studies have found that Salubrinal is efficient in curbing dephosphorylation of eIF2 $\alpha$  and thus can be used as a potential therapy against inflammatory breast cancer [127]. These results indicate that new therapeutic antitumoral agents inhibiting ER chaperones level or UPR adaptive and prosurvival pathways can be utilized as potential cancer therapies with improved outcomes. Recently, two anticancer drugs GSK2606414 [128] and GSK2656157 [129], which act as ATP competitive inhibitors and target PERK/eIF2 $\alpha$  signaling based either on eIF2 $\alpha$  phosphorylation inhibition or on its prolonged phosphorylation, have been introduced. Inhibition of eIF2 $\alpha$  phosphorylation by PERK causes increased ER protein load and further reduces adaptation to ER stress leading to cell death. GSK2656157 has been reported to reduce tumor growth in mouse xenograft models [130]. Most recently the integrated stress response inhibitor (ISRIB) has been identified as a new PERK signaling

inhibitor which rather than inhibiting PERK or eIF2 $\alpha$  phosphorylation blocks downstream processes to reverse the effects of eIF2 $\alpha$  phosphorylation. ISRIB treatment only affects the survival of cells under ER stress [131].

One of the major undesirable consequences of cancer therapy is that many anticancer drugs activate UPR that can lead to drug resistance in patients. Thus recent combined therapeutic approaches are proving to be more efficient against UPR activation. For example usage of 16F16 (PDI inhibitor) resensitizes tumor cells to imatinib in leukemia cells [132]. Likewise, Doxorubicin or Salubrinal along with bortezomib are more effective against diffuse large B cell lymphoma and hepatoma, respectively. Moreover, in cases of multiple myeloma, toyocamycin has been effective against bortezomib resistance [125, 133].

## CONCLUSIONS AND PERSPECTIVES

The three branches of UPR help tumor cells survive harsh tumor microenvironments and also signal surrounding non-tumor cells to facilitate cancer progression. The contradictory and complex role of each of these transducers in regulating antitumor host responses makes it difficult to put them to practical usage in targeted therapies against cancer. These UPR transducers are regulated by intrinsic timers e.g. prolonged ER stress guides IRE1-dependent decay (RIDD) leading to apoptosis. PERK activation and deactivation are regulated in similar manner. All three branches of UPR may have their own transcriptional factor activity for a single target CHOP, which plays a vital role in deciding the fate of the cell. Silencing a single component of UPR at a time is not a rational therapeutic approach. These targets may require coordination between two branches of the UPR [134, 135]. Currently, experimental models are being used to monitor changes in tumor cells under stress. For example, it has been seen that under hypoxia, the initial phase of eIF2 $\alpha$  phosphorylation leads to protein attenuation followed by a transient period of protein synthesis before a permanent reduction in the process of translation [135]. These findings suggest that the effects of future drugs must be time-dependent.

GRP78, which is said to regulate the UPR system, can affect cell apoptosis in different ways by either exhibiting its chaperone activity or by preventing UPR sensor activation and preserving ER calcium homeostasis [136]. Elevated GRP78 levels are usually associated with higher pathologic grade, recurrence, and poor patient survival in cancers of the breast, liver, prostate, and colon [110]. GRP78 assists in tumor progression, spread and drug resistance [110]. Moreover, dormant tumor cells and quiescent tumor cells rely on GRP78 to escape chemotherapy [110]. Several naturally occurring compounds with anticancer activity such as genistein, an active component of soy; epigallocatechin gallate, a component of green tea, and salicylic acid from plants

inhibit either GRP78 expression or its activity [110]. In cancer, versipelostatin, a repressor of GRP78 expression is being used to target the UPR to promote apoptosis or else the usage of proteasomal inhibitors may overload the UPR. Overall, the ideal approach would be to compose both targets without any toxicity. Ideally UPR inhibitors must specifically target the tumor tissue but there is a need to monitor potential toxicities of these inhibitors against B-cells or pancreatic  $\beta$ -cells during future drug discovery efforts [137]. Tissue specific UPR patterns might help to differentiate target tissue and prevent inevitable tumor progression. During chemotherapy, activation of UPR components, particularly PERK, can arrest the cell cycle temporarily but the tumor can regrow once the effect of therapy subsides or cells adapt themselves to stress. Additionally, the inhibition of one branch might result in altered signaling through other branches. As discussed previously, the ICD induction by UPR plays a significant role in the development of novel anticancer strategies. Studies have shown that checkpoint blockade immunotherapy can only be considered for patients when tumors are infiltrated by tumor-infiltrating lymphocytes (TILs) prior to the treatment [138]. In these cases, chemotherapies that do not induce ICD are considered along with immunogenic chemotherapies that may induce UPR response. In conclusion, the capability of the UPR to manage cell fate seems to be a potential cancer therapeutic target. However, contradictory effects of each UPR signaling pathway as well as other confounding factors must be addressed before coming up with a treatment plan involving ER stress regulators.

## Abbreviations

ER: endoplasmic reticulum; UPR: unfolded protein response; PERK: protein kinase (PKR) like ER kinase; IRE1 $\alpha$ : inositol-requiring enzyme 1 $\alpha$ ; ATF6: activating transcription factor 6; GRP78: glucose-regulated protein 78; BiP/GRP78: binding immunoglobulin protein; eIF2: eukaryotic initiation factor 2; ATF4: activating transcription factor 4; CHOP: C/EBP homologous protein; GADD34: growth arrest and DNA damage-inducible; XBP1: X-box binding protein 1; ERAD: ER-associated degradation; JNK: c-Jun N-terminal kinase; ERSE: ER stress response elements; ECM: extracellular matrix; RIDD: IRE1-dependent decay of mRNA; HIF1- $\alpha$ : hypoxia-inducible factor 1 alpha; Ero1: ER oxidoreductin 1; ROS: reactive oxygen species; Nrf2: nuclear factor erythroid 2 [NF-E2]-related factor 2; NF- $\kappa$ B: nuclear factor kappa-light-chain-enhancer of activated B cells; TRAF2: IRE1 $\alpha$ -TNF receptor-associated factor 2; ASK1: apoptosis signal regulated kinase; COX-2: cyclooxygenase-2; LTC4: leukotriene C4; EGF: epidermal growth factor; TGF- $\alpha$ : transforming growth factor- $\alpha$ ; VEGF: vascular endothelial growth factor; FGF2: fibroblast growth factor 2; IL6:

interleukin 6; HCC: hepatocellular carcinoma; EMT: epithelial mesenchymal transition; UPR<sup>mt</sup>: mitochondrial UPR; ERLIN2: endoplasmic reticulum lipid raft associated 2; PDACs: Pancreatic ductal adenocarcinomas; HHV8: Human herpes virus 8; PEL: primary effusion lymphoma; KSHV: Kaposi's sarcoma herpesvirus; HCV: hepatitis C virus; HSV-1: Human simplex virus 1; SARS CoV: severe acute respiratory syndrome coronavirus; PRRs: pattern recognition receptors; VV: vaccinia viral vector; EBV: Epstein-Barr virus; GM-CSF: granulocyte-macrophage colony-stimulating factor; B-CLL: B-cell chronic lymphocytic leukemia; MAPK: mitogen activated protein kinase; AR: androgen receptor; IL-8: Interleukin-8; M-CSF: macrophage colony-stimulating factor; RANKL: receptor activator for nuclear factor  $\kappa$ B ligand; ISRIB: integrated stress response inhibitor; HBV: hepatitis B virus.

## ACKNOWLEDGMENTS

We thank Keith Philibert for critically reading the manuscript. The authors apologize to all investigators whose work was not cited due to oversight or space constraints.

## CONFLICTS OF INTEREST

No potential conflicts of interest exist.

## GRANT SUPPORT

We are grateful to funding from H. M. Bligh Cancer Research Laboratories and NIH-funded grant R01CA192970 to NSW. The funders had no role in design, decision to publish, or preparation of the manuscript. All authors have read the journal's policy on conflicts of interest.

## REFERENCES

1. Kim I, Xu W, Reed JC. Cell death and endoplasmic reticulum stress: disease relevance and therapeutic opportunities. *Nat Rev Drug Discov.* 2008; 7:1013–30. <https://doi.org/10.1038/nrd2755>.
2. Hetz C, Martinon F, Rodriguez D, Glimcher LH. The unfolded protein response: integrating stress signals through the stress sensor IRE1 $\alpha$ . *Physiol Rev.* 2011; 91:1219–43. <https://doi.org/10.1152/physrev.00001.2011>.
3. Zhang K, Shen X, Wu J, Sakaki K, Saunders T, Rutkowski DT, Back SH, Kaufman RJ. Endoplasmic reticulum stress activates cleavage of CREBH to induce a systemic inflammatory response. *Cell.* 2006; 124:587–99. <https://doi.org/10.1016/j.cell.2005.11.040>.

4. Ron D, Walter P. Signal integration in the endoplasmic reticulum unfolded protein response. *Nat Rev Mol Cell Biol.* 2007; 8:519–29. <https://doi.org/10.1038/nrm2199>.
5. Szegezdi E, Logue SE, Gorman AM, Samali A. Mediators of endoplasmic reticulum stress-induced apoptosis. *EMBO Rep.* 2006; 7:880–5. <https://doi.org/10.1038/sj.embor.7400779>.
6. Carrara M, Prischi F, Ali MM. UPR Signal Activation by Luminal Sensor Domains. *Int J Mol Sci.* 2013; 14:6454–66. <https://doi.org/10.3390/ijms14036454>.
7. Tsaytler P, Harding HP, Ron D, Bertolotti A. Selective inhibition of a regulatory subunit of protein phosphatase 1 restores proteostasis. *Science.* 2011; 332:91–4. <https://doi.org/10.1126/science.1201396>.
8. Reimold AM, Iwakoshi NN, Manis J, Vallabhajosyula P, Szomolanyi-Tsuda E, Gravalles EM, Friend D, Grusby MJ, Alt F, Glimcher LH. Plasma cell differentiation requires the transcription factor XBP-1. *Nature.* 2001; 412:300–7. <https://doi.org/10.1038/35085509>.
9. Tirasophon W, Welihinda AA, Kaufman RJ. A stress response pathway from the endoplasmic reticulum to the nucleus requires a novel bifunctional protein kinase/endoribonuclease (Ire1p) in mammalian cells. *Genes Dev.* 1998; 12:1812–24.
10. Oikawa D, Kitamura A, Kinjo M, Iwawaki T. Direct association of unfolded proteins with mammalian ER stress sensor, IRE1beta. *PLoS One.* 2012; 7:e51290. <https://doi.org/10.1371/journal.pone.0051290>.
11. Bertolotti A, Wang X, Novoa I, Jungreis R, Schlessinger K, Cho JH, West AB, Ron D. Increased sensitivity to dextran sodium sulfate colitis in IRE1beta-deficient mice. *J Clin Invest.* 2001; 107:585–93. <https://doi.org/10.1172/JCI11476>.
12. Teske BF, Wek SA, Bunpo P, Cundiff JK, McClintick JN, Anthony TG, Wek RC. The eIF2 kinase PERK and the integrated stress response facilitate activation of ATF6 during endoplasmic reticulum stress. *Mol Biol Cell.* 2011; 22:4390–405. <https://doi.org/10.1091/mbc.E11-06-0510>.
13. Schindler AJ, Schekman R. *In vitro* reconstitution of ER-stress induced ATF6 transport in COPII vesicles. *Proc Natl Acad Sci U S A.* 2009; 106:17775–80. <https://doi.org/10.1073/pnas.0910342106>.
14. Haze K, Yoshida H, Yanagi H, Yura T, Mori K. Mammalian transcription factor ATF6 is synthesized as a transmembrane protein and activated by proteolysis in response to endoplasmic reticulum stress. *Mol Biol Cell.* 1999; 10:3787–99.
15. Ye J, Rawson RB, Komuro R, Chen X, Dave UP, Prywes R, Brown MS, Goldstein JL. ER stress induces cleavage of membrane-bound ATF6 by the same proteases that process SREBPs. *Mol Cell.* 2000; 6:1355–64.
16. Roy B, Lee AS. The mammalian endoplasmic reticulum stress response element consists of an evolutionarily conserved tripartite structure and interacts with a novel stress-inducible complex. *Nucleic Acids Res.* 1999; 27:1437–43.
17. Li M, Baumeister P, Roy B, Phan T, Foti D, Luo S, Lee AS. ATF6 as a transcription activator of the endoplasmic reticulum stress element: thapsigargin stress-induced changes and synergistic interactions with NF-Y and YY1. *Mol Cell Biol.* 2000; 20:5096–106.
18. Tsuru A, Imai Y, Saito M, Kohno K. Novel mechanism of enhancing IRE1alpha-XBP1 signalling via the PERK-ATF4 pathway. *Sci Rep.* 2016; 6:24217. <https://doi.org/10.1038/srep24217>.
19. Walter P, Ron D. The unfolded protein response: from stress pathway to homeostatic regulation. *Science.* 2011; 334:1081–6. <https://doi.org/10.1126/science.1209038>.
20. Mezawa Y, Orimo A. The roles of tumor- and metastasis-promoting carcinoma-associated fibroblasts in human carcinomas. *Cell Tissue Res.* 2016; 365:675–89. <https://doi.org/10.1007/s00441-016-2471-1>.
21. Maishi N, Hida K. Tumor endothelial cells accelerate tumor metastasis. *Cancer Sci.* 2017; 108:1921–6. <https://doi.org/10.1111/cas.13336>.
22. Fridman WH, Zitvogel L, Sautes-Fridman C, Kroemer G. The immune contexture in cancer prognosis and treatment. *Nat Rev Clin Oncol.* 2017; 14:717–34. <https://doi.org/10.1038/nrclinonc.2017.101>.
23. Obacz J, Avril T, Rubio-Patino C, Bossowski JP, Igarria A, Ricci JE, Chevet E. Regulation of tumor-stroma interactions by the unfolded protein response. *FEBS J.* 2017 Dec 14. <https://doi.org/10.1111/febs.14359>. [Epub ahead of print].
24. Mahadevan NR, Anufreichik V, Rodvold JJ, Chiu KT, Sepulveda H, Zanetti M. Cell-extrinsic effects of tumor ER stress imprint myeloid dendritic cells and impair CD8(+) T cell priming. *PLoS One.* 2012; 7:e51845. <https://doi.org/10.1371/journal.pone.0051845>.
25. Spill F, Reynolds DS, Kamm RD, Zaman MH. Impact of the physical microenvironment on tumor progression and metastasis. *Curr Opin Biotechnol.* 2016; 40:41–8. <https://doi.org/10.1016/j.copbio.2016.02.007>.
26. Urra H, Dufey E, Avril T, Chevet E, Hetz C. Endoplasmic Reticulum Stress and the Hallmarks of Cancer. *Trends Cancer.* 2016; 2:252–62. <https://doi.org/10.1016/j.trecan.2016.03.007>.
27. Wang M, Kaufman RJ. The impact of the endoplasmic reticulum protein-folding environment on cancer development. *Nat Rev Cancer.* 2014; 14:581–97. <https://doi.org/10.1038/nrc3800>.
28. Tay KH, Luan Q, Croft A, Jiang CC, Jin L, Zhang XD, Tseng HY. Sustained IRE1 and ATF6 signaling is important for survival of melanoma cells undergoing ER stress. *Cell Signal.* 2014; 26:287–94. <https://doi.org/10.1016/j.cellsig.2013.11.008>.
29. Bruchmann A, Roller C, Walther TV, Schafer G, Lehmusvaara S, Visakorpi T, Klocker H, Cato AC,



- Maddalo D. Bcl-2 associated athanogene 5 (Bag5) is overexpressed in prostate cancer and inhibits ER-stress induced apoptosis. *BMC Cancer*. 2013; 13:96. <https://doi.org/10.1186/1471-2407-13-96>.
30. Ghosh R, Wang L, Wang ES, Perera BG, Igbaria A, Morita S, Prado K, Thamsen M, Caswell D, Macias H, Weiberth KF, Gliedt MJ, Alavi MV, et al. Allosteric inhibition of the IRE1alpha RNase preserves cell viability and function during endoplasmic reticulum stress. *Cell*. 2014; 158:534–48. <https://doi.org/10.1016/j.cell.2014.07.002>.
  31. Giampietri C, Petruccaro S, Conti S, Facchiano A, Filippini A, Ziparo E. Cancer Microenvironment and Endoplasmic Reticulum Stress Response. *Mediators Inflamm*. 2015; 2015:417281. <https://doi.org/10.1155/2015/417281>.
  32. Brocato J, Chervona Y, Costa M. Molecular responses to hypoxia-inducible factor 1alpha and beyond. *Mol Pharmacol*. 2014; 85:651–7. <https://doi.org/10.1124/mol.113.089623>.
  33. Lin JH, Walter P, Yen TS. Endoplasmic reticulum stress in disease pathogenesis. *Annu Rev Pathol*. 2008; 3:399–425. <https://doi.org/10.1146/annurev.pathmechdis.3.121806.151434>.
  34. Rozpedek W, Pytel D, Mucha B, Leszczynska H, Diehl JA, Majsterek I. The Role of the PERK/eIF2alpha/ATF4/CHOP Signaling Pathway in Tumor Progression During Endoplasmic Reticulum Stress. *Curr Mol Med*. 2016; 16:533–44.
  35. Marciniak SJ, Yun CY, Oyadomari S, Novoa I, Zhang Y, Jungreis R, Nagata K, Harding HP, Ron D. CHOP induces death by promoting protein synthesis and oxidation in the stressed endoplasmic reticulum. *Genes Dev*. 2004; 18:3066–77. <https://doi.org/10.1101/gad.1250704>.
  36. Song B, Scheuner D, Ron D, Pennathur S, Kaufman RJ. Chop deletion reduces oxidative stress, improves beta cell function, and promotes cell survival in multiple mouse models of diabetes. *J Clin Invest*. 2008; 118:3378–89. <https://doi.org/10.1172/JCI34587>.
  37. Brunelle JK, Bell EL, Quesada NM, Vercauteren K, Tiranti V, Zeviani M, Scarpulla RC, Chandel NS. Oxygen sensing requires mitochondrial ROS but not oxidative phosphorylation. *Cell Metab*. 2005; 1:409–14. <https://doi.org/10.1016/j.cmet.2005.05.002>.
  38. Glasauer A, Chandel NS. Targeting antioxidants for cancer therapy. *Biochem Pharmacol*. 2014; 92:90–101. <https://doi.org/10.1016/j.bcp.2014.07.017>.
  39. Peng TI, Jou MJ. Oxidative stress caused by mitochondrial calcium overload. *Ann N Y Acad Sci*. 2010; 1201:183–8. <https://doi.org/10.1111/j.1749-6632.2010.05634.x>.
  40. Bobrovnikova-Marjon E, Grigoriadou C, Pytel D, Zhang F, Ye J, Koumenis C, Cavener D, Diehl JA. PERK promotes cancer cell proliferation and tumor growth by limiting oxidative DNA damage. *Oncogene*. 2010; 29:3881–95. <https://doi.org/10.1038/onc.2010.153>.
  41. Tam AB, Mercado EL, Hoffmann A, Niwa M. ER stress activates NF-kappaB by integrating functions of basal IKK activity, IRE1 and PERK. *PLoS One*. 2012; 7:e45078. <https://doi.org/10.1371/journal.pone.0045078>.
  42. Zhang J, Xu LG, Han KJ, Shu HB. Identification of a ZU5 and death domain-containing inhibitor of NF-kappaB. *J Biol Chem*. 2004; 279:17819–25. <https://doi.org/10.1074/jbc.M310737200>.
  43. Nakajima S, Hiramatsu N, Hayakawa K, Saito Y, Kato H, Huang T, Yao J, Paton AW, Paton JC, Kitamura M. Selective abrogation of BiP/GRP78 blunts activation of NF-kappaB through the ATF6 branch of the UPR: involvement of C/EBPbeta and mTOR-dependent dephosphorylation of Akt. *Mol Cell Biol*. 2011; 31:1710–8. <https://doi.org/10.1128/MCB.00939-10>.
  44. Yamazaki H, Hiramatsu N, Hayakawa K, Tagawa Y, Okamura M, Ogata R, Huang T, Nakajima S, Yao J, Paton AW, Paton JC, Kitamura M. Activation of the Akt-NF-kappaB pathway by subtilase cytotoxin through the ATF6 branch of the unfolded protein response. *J Immunol*. 2009; 183:1480–7. <https://doi.org/10.4049/jimmunol.0900017>.
  45. Hu P, Han Z, Couvillon AD, Kaufman RJ, Exton JH. Autocrine tumor necrosis factor alpha links endoplasmic reticulum stress to the membrane death receptor pathway through IRE1alpha-mediated NF-kappaB activation and down-regulation of TRAF2 expression. *Mol Cell Biol*. 2006; 26:3071–84. <https://doi.org/10.1128/MCB.26.8.3071-3084.2006>.
  46. Bassik MC, Scorrano L, Oakes SA, Pozzan T, Korsmeyer SJ. Phosphorylation of BCL-2 regulates ER Ca2+ homeostasis and apoptosis. *EMBO J*. 2004; 23:1207–16. <https://doi.org/10.1038/sj.emboj.7600104>.
  47. Kwak HJ, Choi HE, Cheon HG. 5-LO inhibition ameliorates palmitic acid-induced ER stress, oxidative stress and insulin resistance via AMPK activation in murine myotubes. *Sci Rep*. 2017; 7:5025. <https://doi.org/10.1038/s41598-017-05346-5>.
  48. Roberts HR, Smartt HJ, Greenhough A, Moore AE, Williams AC, Paraskeva C. Colon tumour cells increase PGE(2) by regulating COX-2 and 15-PGDH to promote survival during the microenvironmental stress of glucose deprivation. *Carcinogenesis*. 2011; 32:1741–7. <https://doi.org/10.1093/carcin/bgr210>.
  49. Dvash E, Har-Tal M, Barak S, Meir O, Rubinstein M. Leukotriene C4 is the major trigger of stress-induced oxidative DNA damage. *Nat Commun*. 2015; 6:10112. <https://doi.org/10.1038/ncomms10112>.
  50. Moore CE, Omikorede O, Gomez E, Willars GB, Herbert TP. PERK activation at low glucose concentration is mediated by SERCA pump inhibition and confers preemptive cytoprotection to pancreatic beta-cells. *Mol Endocrinol*. 2011; 25:315–26. <https://doi.org/10.1210/me.2010-0309>.
  51. Spiotto MT, Banh A, Papandreou I, Cao H, Galvez MG, Gurtner GC, Denko NC, Le QT, Koong AC. Imaging the unfolded protein response in primary tumors reveals microenvironments with metabolic variations that predict



- tumor growth. *Cancer Res.* 2010; 70:78–88. <https://doi.org/10.1158/0008-5472.CAN-09-2747>.
52. Lee AS. Glucose-regulated proteins in cancer: molecular mechanisms and therapeutic potential. *Nat Rev Cancer.* 2014; 14:263–76. <https://doi.org/10.1038/nrc3701>.
  53. Ghosh R, Lipson KL, Sargent KE, Mercurio AM, Hunt JS, Ron D, Urano F. Transcriptional regulation of VEGF-A by the unfolded protein response pathway. *PLoS One.* 2010; 5:e9575. <https://doi.org/10.1371/journal.pone.0009575>.
  54. Vandewynckel YP, Laukens D, Bogaerts E, Paridaens A, Van den Bussche A, Verhelst X, Van Steenkiste C, Descamps B, Vanhove C, Libbrecht L, De Rycke R, Lambrecht BN, Geerts A, et al. Modulation of the unfolded protein response impedes tumor cell adaptation to proteotoxic stress: a PERK for hepatocellular carcinoma therapy. *Hepato Int.* 2015; 9:93–104. <https://doi.org/10.1007/s12072-014-9582-0>.
  55. Blais JD, Addison CL, Edge R, Falls T, Zhao H, Wary K, Koumenis C, Harding HP, Ron D, Holcik M, Bell JC. Perk-dependent translational regulation promotes tumor cell adaptation and angiogenesis in response to hypoxic stress. *Mol Cell Biol.* 2006; 26:9517–32. <https://doi.org/10.1128/MCB.01145-06>.
  56. Ranganathan AC, Zhang L, Adam AP, Aguirre-Ghiso JA. Functional coupling of p38-induced up-regulation of BiP and activation of RNA-dependent protein kinase-like endoplasmic reticulum kinase to drug resistance of dormant carcinoma cells. *Cancer Res.* 2006; 66:1702–11. <https://doi.org/10.1158/0008-5472.CAN-05-3092>.
  57. Liu J, Xiao M, Li J, Wang D, He Y, He J, Gao F, Mai L, Li Y, Liang Y, Liu Y, Zhong X. Activation of UPR Signaling Pathway is Associated With the Malignant Progression and Poor Prognosis in Prostate Cancer. *Prostate.* 2017; 77:274–81. <https://doi.org/10.1002/pros.23264>.
  58. Chen X, Iliopoulos D, Zhang Q, Tang Q, Greenblatt MB, Hatziaepostolou M, Lim E, Tam WL, Ni M, Chen Y, Mai J, Shen H, Hu DZ, et al. XBP1 promotes triple-negative breast cancer by controlling the HIF1alpha pathway. *Nature.* 2014; 508:103–7. <https://doi.org/10.1038/nature13119>.
  59. Tanjore H, Cheng DS, Degryse AL, Zoz DF, Abdolrasulnia R, Lawson WE, Blackwell TS. Alveolar epithelial cells undergo epithelial-to-mesenchymal transition in response to endoplasmic reticulum stress. *J Biol Chem.* 2015; 290:3277. <https://doi.org/10.1074/jbc.A110.181164>.
  60. Chae YC, Caino MC, Lisanti S, Ghosh JC, Dohi T, Danial NN, Villanueva J, Ferrero S, Vaira V, Santambrogio L, Bosari S, Languino LR, Herlyn M, et al. Control of tumor bioenergetics and survival stress signaling by mitochondrial HSP90s. *Cancer Cell.* 2012; 22:331–44. <https://doi.org/10.1016/j.ccr.2012.07.015>.
  61. Siegelin MD, Dohi T, Raskett CM, Orlowski GM, Powers CM, Gilbert CA, Ross AH, Plescia J, Altieri DC. Exploiting the mitochondrial unfolded protein response for cancer therapy in mice and human cells. *J Clin Invest.* 2011; 121:1349–60. <https://doi.org/10.1172/JCI44855>.
  62. Fujimoto T, Onda M, Nagai H, Nagahata T, Ogawa K, Emi M. Upregulation and overexpression of human X-box binding protein 1 (hXBP-1) gene in primary breast cancers. *Breast Cancer.* 2003; 10:301–6.
  63. Wang G, Zhang X, Lee JS, Wang X, Yang ZQ, Zhang K. Endoplasmic reticulum factor ERLIN2 regulates cytosolic lipid content in cancer cells. *Biochem J.* 2012; 446:415–25. <https://doi.org/10.1042/BJ20112050>.
  64. Andruska N, Zheng X, Yang X, Helferich WG, Shapiro DJ. Anticipatory estrogen activation of the unfolded protein response is linked to cell proliferation and poor survival in estrogen receptor alpha-positive breast cancer. *Oncogene.* 2015; 34:3760–9. <https://doi.org/10.1038/onc.2014.292>.
  65. Rao C, Shetty J, Prasad KH. Immunohistochemical profile and morphology in triple - negative breast cancers. *J Clin Diagn Res.* 2013; 7:1361–5. <https://doi.org/10.7860/JCDR/2013/5823.3129>.
  66. Rodrigues LM, Chung YL, Al Saffar NM, Sharp SY, Jackson LE, Banerji U, Stubbs M, Leach MO, Griffiths JR, Workman P. Effects of HSP90 inhibitor 17-allylamino-17-demethoxygeldanamycin (17-AAG) on NEU/HER2 overexpressing mammary tumours in MMTV-NEU-NT mice monitored by Magnetic Resonance Spectroscopy. *BMC Res Notes.* 2012; 5:250. <https://doi.org/10.1186/1756-0500-5-250>.
  67. Choe JH. Altered Responses to Endoplasmic Reticulum Stress in Pancreatic Cancer (2011). UT GSBS Dissertations and Theses (Open Access). 117. [https://digitalcommons.library.tmc.edu/utgsbs\\_dissertations/117](https://digitalcommons.library.tmc.edu/utgsbs_dissertations/117).
  68. Dumartin L, Alrawashdeh W, Trabulo SM, Radon TP, Steiger K, Feakins RM, di Magliano MP, Heeschen C, Esposito I, Lemoine NR, Crnogorac-Jurcevic T. ER stress protein AGR2 precedes and is involved in the regulation of pancreatic cancer initiation. *Oncogene.* 2017; 36:3094–103. <https://doi.org/10.1038/onc.2016.459>.
  69. Fung TS, Torres J, Liu DX. The Emerging Roles of Viroporins in ER Stress Response and Autophagy Induction during Virus Infection. *Viruses.* 2015; 7:2834–57. <https://doi.org/10.3390/v7062749>.
  70. Chan SW. Unfolded protein response in hepatitis C virus infection. *Front Microbiol.* 2014; 5:233. <https://doi.org/10.3389/fmicb.2014.00233>.
  71. Lazar C, Uta M, Branza-Nichita N. Modulation of the unfolded protein response by the human hepatitis B virus. *Front Microbiol.* 2014; 5:433. <https://doi.org/10.3389/fmicb.2014.00433>.
  72. Jenner RG, Maillard K, Cattini N, Weiss RA, Boshoff C, Wooster R, Kellam P. Kaposi's sarcoma-associated herpesvirus-infected primary effusion lymphoma has a plasma cell gene expression profile. *Proc Natl Acad Sci U S A.* 2003; 100:10399–404. <https://doi.org/10.1073/pnas.1630810100>.
  73. Klein U, Tu Y, Stolovitzky GA, Keller JL, Haddad J Jr, Miljkovic V, Cattoretti G, Califano A, Dalla-Favera R. Transcriptional analysis of the B cell germinal center reaction. *Proc Natl Acad Sci U S A.* 2003; 100:2639–44. <https://doi.org/10.1073/pnas.0437996100>.

74. De Leo A, Chen HS, Hu CC, Lieberman PM. Deregulation of KSHV latency conformation by ER-stress and caspase-dependent RAD21-cleavage. *PLoS Pathog.* 2017; 13:e1006596. <https://doi.org/10.1371/journal.ppat.1006596>.
75. Osowski CM, Urano F. Measuring ER stress and the unfolded protein response using mammalian tissue culture system. *Methods Enzymol.* 2011; 490:71–92. <https://doi.org/10.1016/B978-0-12-385114-7.00004-0>.
76. Shigemi Z, Baba Y, Hara N, Matsuiro J, Kagawa H, Watanabe T, Fujimuro M. Effects of ER stress on unfolded protein responses, cell survival, and viral replication in primary effusion lymphoma. *Biochem Biophys Res Commun.* 2016; 469:565–72. <https://doi.org/10.1016/j.bbrc.2015.12.032>.
77. Masud Alam M, Kariya R, Kawaguchi A, Matsuda K, Kudo E, Okada S. Inhibition of autophagy by chloroquine induces apoptosis in primary effusion lymphoma *in vitro* and *in vivo* through induction of endoplasmic reticulum stress. *Apoptosis.* 2016; 21:1191–201. <https://doi.org/10.1007/s10495-016-1277-7>.
78. Leung HJ, Duran EM, Kurtoglu M, Andreansky S, Lampidis TJ, Mesri EA. Activation of the unfolded protein response by 2-deoxy-D-glucose inhibits Kaposi's sarcoma-associated herpesvirus replication and gene expression. *Antimicrob Agents Chemother.* 2012; 56:5794–803. <https://doi.org/10.1128/AAC.01126-12>.
79. Sharma-Walia N, Raghu H, Sadagopan S, Sivakumar R, Veettil MV, Naranatt PP, Smith MM, Chandran B. Cyclooxygenase 2 induced by Kaposi's sarcoma-associated herpesvirus early during *in vitro* infection of target cells plays a role in the maintenance of latent viral gene expression. *J Virol.* 2006; 80:6534–52. <https://doi.org/10.1128/JVI.00231-06>.
80. Sharma-Walia N, Paul AG, Bottero V, Sadagopan S, Veettil MV, Kerur N, Chandran B. Kaposi's sarcoma associated herpes virus (KSHV) induced COX-2: a key factor in latency, inflammation, angiogenesis, cell survival and invasion. *PLoS Pathog.* 2010; 6:e1000777. <https://doi.org/10.1371/journal.ppat.1000777>.
81. Paul AG, Chandran B, Sharma-Walia N. Concurrent targeting of eicosanoid receptor 1/eicosanoid receptor 4 receptors and COX-2 induces synergistic apoptosis in Kaposi's sarcoma-associated herpesvirus and Epstein-Barr virus associated non-Hodgkin lymphoma cell lines. *Transl Res.* 2013; 161:447–68. <https://doi.org/10.1016/j.trsl.2013.02.008>.
82. Sharma-Walia N, Chandran K, Patel K, Veettil MV, Marginean A. The Kaposi's sarcoma-associated herpesvirus (KSHV)-induced 5-lipoxygenase-leukotriene B4 cascade plays key roles in KSHV latency, monocyte recruitment, and lipogenesis. *J Virol.* 2014; 88:2131–56. <https://doi.org/10.1128/JVI.02786-13>.
83. Chandrasekharan JA, Sharma-Walia N. Lipoxins: nature's way to resolve inflammation. *J Inflamm Res.* 2015; 8:181–92. <https://doi.org/10.2147/JIR.S90380>.
84. Chandrasekharan JA, Huang XM, Hwang AC, Sharma-Walia N. Altering the Anti-inflammatory Lipoxin Microenvironment: a New Insight into Kaposi's Sarcoma-Associated Herpesvirus Pathogenesis. *J Virol.* 2016; 90:11020–31. <https://doi.org/10.1128/JVI.01491-16>.
85. Chan SW. The unfolded protein response in virus infections. *Front Microbiol.* 2014; 5:518. <https://doi.org/10.3389/fmicb.2014.00518>.
86. Carpenter JE, Grose C. Varicella-zoster virus glycoprotein expression differentially induces the unfolded protein response in infected cells. *Front Microbiol.* 2014; 5:322. <https://doi.org/10.3389/fmicb.2014.00322>.
87. Chou J, Roizman B. Herpes simplex virus 1 gamma(1)34.5 gene function, which blocks the host response to infection, maps in the homologous domain of the genes expressed during growth arrest and DNA damage. *Proc Natl Acad Sci U S A.* 1994; 91:5247–51.
88. Netherton CL, Parsley JC, Wileman T. African swine fever virus inhibits induction of the stress-induced proapoptotic transcription factor CHOP/GADD153. *J Virol.* 2004; 78:10825–8. <https://doi.org/10.1128/JVI.78.19.10825-10828.2004>.
89. Pavio N, Romano PR, Graczyk TM, Feinstone SM, Taylor DR. Protein synthesis and endoplasmic reticulum stress can be modulated by the hepatitis C virus envelope protein E2 through the eukaryotic initiation factor 2alpha kinase PERK. *J Virol.* 2003; 77:3578–85.
90. Mulvey M, Arias C, Mohr I. Maintenance of endoplasmic reticulum (ER) homeostasis in herpes simplex virus type 1-infected cells through the association of a viral glycoprotein with PERK, a cellular ER stress sensor. *J Virol.* 2007; 81:3377–90. <https://doi.org/10.1128/JVI.02191-06>.
91. Tirosh B, Iwakoshi NN, Lilley BN, Lee AH, Glimcher LH, Ploegh HL. Human cytomegalovirus protein US11 provokes an unfolded protein response that may facilitate the degradation of class I major histocompatibility complex products. *J Virol.* 2005; 79:2768–79. <https://doi.org/10.1128/JVI.79.5.2768-2779.2005>.
92. Smith JA, Schmechel SC, Raghavan A, Abelson M, Reilly C, Katze MG, Kaufman RJ, Bohjanen PR, Schiff LA. Reovirus induces and benefits from an integrated cellular stress response. *J Virol.* 2006; 80:2019–33. <https://doi.org/10.1128/JVI.80.4.2019-2033.2006>.
93. Huang ZM, Tan T, Yoshida H, Mori K, Ma Y, Yen TS. Activation of hepatitis B virus S promoter by a cell type-restricted IRE1-dependent pathway induced by endoplasmic reticulum stress. *Mol Cell Biol.* 2005; 25:7522–33. <https://doi.org/10.1128/MCB.25.17.7522-7533.2005>.
94. Sung SC, Chao CY, Jeng KS, Yang JY, Lai MM. The 8ab protein of SARS-CoV is a luminal ER membrane-associated

- protein and induces the activation of ATF6. *Virology*. 2009; 387:402–13. <https://doi.org/10.1016/j.virol.2009.02.021>.
95. Byun H, Gou Y, Zook A, Lozano MM, Dudley JP. ERAD and how viruses exploit it. *Front Microbiol*. 2014; 5:330. <https://doi.org/10.3389/fmicb.2014.00330>.
  96. Bhattacharyya S. Can't RIDD off viruses. *Front Microbiol*. 2014; 5:292. <https://doi.org/10.3389/fmicb.2014.00292>.
  97. Seubert CM, Stritzker J, Hess M, Donat U, Sturm JB, Chen N, von Hof JM, Krewer B, Tietze LF, Gentschev I, Szalay AA. Enhanced tumor therapy using vaccinia virus strain GLV-1h68 in combination with a beta-galactosidase-activatable prodrug seco-analog of duocarmycin SA. *Cancer Gene Ther*. 2011; 18:42–52. <https://doi.org/10.1038/cgt.2010.49>.
  98. Yu Z, Li S, Brader P, Chen N, Yu YA, Zhang Q, Szalay AA, Fong Y, Wong RJ. Oncolytic vaccinia therapy of squamous cell carcinoma. *Mol Cancer*. 2009; 8:45. <https://doi.org/10.1186/1476-4598-8-45>.
  99. Yu YA, Shabahang S, Timiryasova TM, Zhang Q, Beltz R, Gentschev I, Goebel W, Szalay AA. Visualization of tumors and metastases in live animals with bacteria and vaccinia virus encoding light-emitting proteins. *Nat Biotechnol*. 2004; 22:313–20. <https://doi.org/10.1038/nbt937>.
  100. Carpenter JE, Jackson W, Benetti L, Grose C. Autophagosome formation during varicella-zoster virus infection following endoplasmic reticulum stress and the unfolded protein response. *J Virol*. 2011; 85:9414–24. <https://doi.org/10.1128/JVI.00281-11>.
  101. Hellebrand E, Mautner J, Reischbach G, Nimmerjahn F, Hallek M, Mocikat R, Hammerschmidt W. Epstein-Barr virus vector-mediated gene transfer into human B cells: potential for antitumor vaccination. *Gene Ther*. 2006; 13:150–62. <https://doi.org/10.1038/sj.gt.3302602>.
  102. Sen D, Balakrishnan B, Jayandharan GR. Cellular unfolded protein response against viruses used in gene therapy. *Front Microbiol*. 2014; 5:250. <https://doi.org/10.3389/fmicb.2014.00250>.
  103. Mimura N, Fulciniti M, Gorgun G, Tai YT, Cirstea D, Santo L, Hu Y, Fabre C, Minami J, Ohguchi H, Kiziltepe T, Ikeda H, Kawano Y, et al. Blockade of XBP1 splicing by inhibition of IRE1alpha is a promising therapeutic option in multiple myeloma. *Blood*. 2012; 119:5772–81. <https://doi.org/10.1182/blood-2011-07-366633>.
  104. Jha BK, Polyakova I, Kessler P, Dong B, Dickerman B, Sen GC, Silverman RH. Inhibition of RNase L and RNA-dependent protein kinase (PKR) by sunitinib impairs antiviral innate immunity. *J Biol Chem*. 2011; 286:26319–26. <https://doi.org/10.1074/jbc.M111.253443>.
  105. Ali MM, Bagratuni T, Davenport EL, Nowak PR, Silva-Santisteban MC, Hardcastle A, McAndrews C, Rowlands MG, Morgan GJ, Aherne W, Collins I, Davies FE, Pearl LH. Structure of the Ire1 autophosphorylation complex and implications for the unfolded protein response. *EMBO J*. 2011; 30:894–905. <https://doi.org/10.1038/emboj.2011.18>.
  106. Wang J, Pareja KA, Kaiser CA, Sevier CS. Redox signaling via the molecular chaperone BiP protects cells against endoplasmic reticulum-derived oxidative stress. *Elife*. 2014; 3:e03496. <https://doi.org/10.7554/eLife.03496>.
  107. Zhuang L, Scolyer RA, Lee CS, McCarthy SW, Cooper WA, Zhang XD, Thompson JF, Hersey P. Expression of glucose-regulated stress protein GRP78 is related to progression of melanoma. *Histopathology*. 2009; 54:462–70. <https://doi.org/10.1111/j.1365-2559.2009.03242.x>.
  108. Kosakowska-Cholody T, Lin J, Srideshikan SM, Scheffer L, Tarasova NI, Acharya JK. HKH40A downregulates GRP78/BiP expression in cancer cells. *Cell Death Dis*. 2014; 5:e1240. <https://doi.org/10.1038/cddis.2014.203>.
  109. Pyrko P, Schonthal AH, Hofman FM, Chen TC, Lee AS. The unfolded protein response regulator GRP78/BiP as a novel target for increasing chemosensitivity in malignant gliomas. *Cancer Res*. 2007; 67:9809–16. <https://doi.org/10.1158/0008-5472.CAN-07-0625>.
  110. Lee AS. GRP78 induction in cancer: therapeutic and prognostic implications. *Cancer Res*. 2007; 67:3496–9. <https://doi.org/10.1158/0008-5472.CAN-07-0325>.
  111. Wisdom R, Johnson RS, Moore C. c-Jun regulates cell cycle progression and apoptosis by distinct mechanisms. *EMBO J*. 1999; 18:188–97. <https://doi.org/10.1093/emboj/18.1.188>.
  112. Thorpe JA, Schwarze SR. IRE1alpha controls cyclin A1 expression and promotes cell proliferation through XBP-1. *Cell Stress Chaperones*. 2010; 15:497–508. <https://doi.org/10.1007/s12192-009-0163-4>.
  113. Chevet E, Hetz C, Samali A. Endoplasmic reticulum stress-activated cell reprogramming in oncogenesis. *Cancer Discov*. 2015; 5:586–97. <https://doi.org/10.1158/2159-8290.CD-14-1490>.
  114. Obacz J, Avril T, Le Reste PJ, Urria H, Quillien V, Hetz C, Chevet E. Endoplasmic reticulum proteostasis in glioblastoma-From molecular mechanisms to therapeutic perspectives. *Sci Signal*. 2017; 10. <https://doi.org/10.1126/scisignal.aal2323>.
  115. Dejeans N, Manie S, Hetz C, Bard F, Hupp T, Agostinis P, Samali A, Chevet E. Addicted to secrete - novel concepts and targets in cancer therapy. *Trends Mol Med*. 2014; 20:242–50. <https://doi.org/10.1016/j.molmed.2013.12.003>.
  116. Pluquet O, Dejeans N, Boucheccareilh M, Lhomond S, Pineau R, Higa A, Delugin M, Combe C, Loriot S, Cubel G, Dugot-Senant N, Vital A, Loiseau H, et al. Posttranscriptional regulation of PER1 underlies the oncogenic function of IRE1alpha. *Cancer Res*. 2013; 73:4732–43. <https://doi.org/10.1158/0008-5472.CAN-12-3989>.
  117. Jabouille A, Delugin M, Pineau R, Dubrac A, Soulet F, Lhomond S, Pallares-Lupon N, Prats H, Bikfalvi A, Chevet E, Touriol C, Moenner M. Glioblastoma invasion and cooption depend on IRE1alpha endoribonuclease activity. *Oncotarget*. 2015; 6:24922–34. <https://doi.org/10.18632/oncotarget.4679>.



118. Cancer Genome Atlas Research N. Comprehensive genomic characterization defines human glioblastoma genes and core pathways. *Nature*. 2008; 455:1061–8. <https://doi.org/10.1038/nature07385>.
119. Parsons DW, Jones S, Zhang X, Lin JC, Leary RJ, Angenendt P, Mankoo P, Carter H, Siu IM, Gallia GL, Olivi A, McLendon R, Rasheed BA, et al. An integrated genomic analysis of human glioblastoma multiforme. *Science*. 2008; 321:1807–12. <https://doi.org/10.1126/science.1164382>.
120. Lhomond S, Avril T, Dejeans N, Voutetakis K, Doultzinos D, McMahon M, Pineau R, Obacz J, Papadodima O, Joann F, Bourien H, Logotheti M, Jegou G, et al. Dual IRE1 RNase functions dictate glioblastoma development. *EMBO Mol Med*. 2018; 10. <https://doi.org/10.15252/emmm.201707929>.
121. Kaser A, Lee AH, Franke A, Glickman JN, Zeissig S, Tilg H, Nieuwenhuis EE, Higgins DE, Schreiber S, Glimcher LH, Blumberg RS. XBP1 links ER stress to intestinal inflammation and confers genetic risk for human inflammatory bowel disease. *Cell*. 2008; 134:743–56. <https://doi.org/10.1016/j.cell.2008.07.021>.
122. Volkmann K, Lucas JL, Vuga D, Wang X, Brumm D, Stiles C, Kriebel D, Der-Sarkissian A, Krishnan K, Schweitzer C, Liu Z, Malyankar UM, Chiovitti D, et al. Potent and selective inhibitors of the inositol-requiring enzyme 1 endoribonuclease. *J Biol Chem*. 2011; 286:12743–55. <https://doi.org/10.1074/jbc.M110.199737>.
123. Cross BC, Bond PJ, Sadowski PG, Jha BK, Zak J, Goodman JM, Silverman RH, Neubert TA, Baxendale IR, Ron D, Harding HP. The molecular basis for selective inhibition of unconventional mRNA splicing by an IRE1-binding small molecule. *Proc Natl Acad Sci U S A*. 2012; 109:E869–78. <https://doi.org/10.1073/pnas.1115623109>.
124. Papandreou I, Denko NC, Olson M, Van Melckebeke H, Lust S, Tam A, Solow-Cordero DE, Bouley DM, Offner F, Niwa M, Koong AC. Identification of an Ire1 $\alpha$  endonuclease specific inhibitor with cytotoxic activity against human multiple myeloma. *Blood*. 2011; 117:1311–4. <https://doi.org/10.1182/blood-2010-08-303099>.
125. Ri M, Tashiro E, Oikawa D, Shinjo S, Tokuda M, Yokouchi Y, Narita T, Masaki A, Ito A, Ding J, Kusumoto S, Ishida T, Komatsu H, et al. Identification of Toyocamycin, an agent cytotoxic for multiple myeloma cells, as a potent inhibitor of ER stress-induced XBP1 mRNA splicing. *Blood Cancer J*. 2012; 2:e79. <https://doi.org/10.1038/bcj.2012.26>.
126. Shuda M, Kondoh N, Imazeki N, Tanaka K, Okada T, Mori K, Hada A, Arai M, Wakatsuki T, Matsubara O, Yamamoto N, Yamamoto M. Activation of the ATF6, XBP1 and grp78 genes in human hepatocellular carcinoma: a possible involvement of the ER stress pathway in hepatocarcinogenesis. *J Hepatol*. 2003; 38:605–14.
127. Hamamura K, Minami K, Tanjung N, Wan Q, Koizumi M, Matsuura N, Na S, Yokota H. Attenuation of malignant phenotypes of breast cancer cells through eIF2 $\alpha$ -mediated downregulation of Rac1 signaling. *Int J Oncol*. 2014; 44:1980–8. <https://doi.org/10.3892/ijo.2014.2366>.
128. Axten JM, Medina JR, Feng Y, Shu A, Romeril SP, Grant SW, Li WH, Heerding DA, Minthorn E, Mencken T, Atkins C, Liu Q, Rabindran S, et al. Discovery of 7-methyl-5-(1-{[3-(trifluoromethyl)phenyl]acetyl}-2,3-dihydro-1H-indol-5-yl)-7H-pyrrolo[2,3-d]pyrimidin-4-amine (GSK2606414), a potent and selective first-in-class inhibitor of protein kinase R (PKR)-like endoplasmic reticulum kinase (PERK). *J Med Chem*. 2012; 55:7193–207. <https://doi.org/10.1021/jm300713s>.
129. Axten JM, Romeril SP, Shu A, Ralph J, Medina JR, Feng Y, Li WH, Grant SW, Heerding DA, Minthorn E, Mencken T, Gaul N, Goetz A, et al. Discovery of GSK2656157: An Optimized PERK Inhibitor Selected for Preclinical Development. *ACS Med Chem Lett*. 2013; 4:964–8. <https://doi.org/10.1021/ml400228e>.
130. Atkins C, Liu Q, Minthorn E, Zhang SY, Figueroa DJ, Moss K, Stanley TB, Sanders B, Goetz A, Gaul N, Choudhry AE, Alsaid H, Jucker BM, et al. Characterization of a novel PERK kinase inhibitor with antitumor and antiangiogenic activity. *Cancer Res*. 2013; 73:1993–2002. <https://doi.org/10.1158/0008-5472.CAN-12-3109>.
131. Sidrauskis C, Acosta-Alvarez D, Khoutrouky A, Vedantham P, Hearn BR, Li H, Gamache K, Gallagher CM, Ang KK, Wilson C, Okreglak V, Ashkenazi A, Hann B, et al. Pharmacological brake-release of mRNA translation enhances cognitive memory. *Elife*. 2013; 2:e00498. <https://doi.org/10.7554/eLife.00498>.
132. Avril T, Vauleon E, Chevet E. Endoplasmic reticulum stress signaling and chemotherapy resistance in solid cancers. *Oncogenesis*. 2017; 6:e373. <https://doi.org/10.1038/oncsis.2017.72>.
133. Roue G, Perez-Galan P, Mozos A, Lopez-Guerra M, Xargay-Torrent S, Rosich L, Saborit-Villarroya I, Normant E, Campo E, Colomer D. The Hsp90 inhibitor IPI-504 overcomes bortezomib resistance in mantle cell lymphoma *in vitro* and *in vivo* by down-regulation of the prosurvival ER chaperone BiP/Grp78. *Blood*. 2011; 117:1270–9. <https://doi.org/10.1182/blood-2010-04-278853>.
134. Gorman AM, Healy SJ, Jager R, Samali A. Stress management at the ER: regulators of ER stress-induced apoptosis. *Pharmacol Ther*. 2012; 134:306–16. <https://doi.org/10.1016/j.pharmthera.2012.02.003>.
135. Fels DR, Koumenis C. The PERK/eIF2 $\alpha$ /ATF4 module of the UPR in hypoxia resistance and tumor growth. *Cancer Biol Ther*. 2006; 5:723–8.
136. Dong D, Ni M, Li J, Xiong S, Ye W, Virrey JJ, Mao C, Ye R, Wang M, Pen L, Dubeau L, Groshen S, Hofman FM, et al. Critical role of the stress chaperone GRP78/BiP in tumor proliferation, survival, and tumor angiogenesis in transgene-induced mammary tumor development. *Cancer*



- Res. 2008; 68:498–505. <https://doi.org/10.1158/0008-5472.CAN-07-2950>.
137. Teodoro T, Odisho T, Sidorova E, Volchuk A. Pancreatic beta-cells depend on basal expression of active ATF6alpha-p50 for cell survival even under nonstress conditions. *Am J Physiol Cell Physiol.* 2012; 302:C992-1003. <https://doi.org/10.1152/ajpcell.00160.2011>.
138. Cubillos-Ruiz JR, Silberman PC, Rutkowski MR, Chopra S, Perales-Puchalt A, Song M, Zhang S, Bettigole SE, Gupta D, Holcomb K, Ellenson LH, Caputo T, Lee AH, et al. ER Stress Sensor XBP1 Controls Anti-tumor Immunity by Disrupting Dendritic Cell Homeostasis. *Cell.* 2015; 161:1527–38. <https://doi.org/10.1016/j.cell.2015.05.025>.
